# Supplementary material
Source: Springer Nature journal article supplement (https://www.springermedizin.de/resource/supplementary/12913_2011_2290_MOESM6_ESM.pdf/9529978)
Supplement: MOESM6 [file 9529978]

General Practice Networks recruit practices

Cluster random allocation of practices to sequence of education interventions

**Group 1: CHF Topic**  
Data extraction

1st clinical meeting: CHF

2nd clinical meeting: CHF

**HT Topic**

1st clinical meeting: HT

2nd clinical meeting: HT

**Intervention Group 1**

**Group 2: HT Topic**  
Data extraction

1st clinical meeting: HT

2nd clinical meeting: HT

**CHF Topic**

1st clinical meeting: CHF

2nd clinical meeting: CHF

**Intervention Group 2**

**Group 3: 'wait control'**  
Data extraction

**HT or CHF Topic**

1<sup>st</sup> clinical meeting: HT or CHF

2nd clinical meeting: HT or CHF

**CHF or HT Topic**

1st clinical meeting: CHF or HT

2<sup>nd</sup> clinical meeting: CHF or HT

**Wait control Group 3**

**Time -2m**

Software installation & data cleaning

**Time 0**

Baseline data extraction for all groups

**Time 3 m**

data extraction for all groups

**Time 6 m**

data extraction for all groups

**Time 9 m**

data extraction for all groups

**Time 12 m**

data extraction for all groups

**Time 15 m**

data extraction for all groups

**Time 18 m**

data extraction for all groups
